# Supplementary material for: Robust reprogramming of glia into neurons by inhibition of Notch signaling and nuclear factor I (NFI) factors in adult mammalian retina
Source: PubMed Central journal article supplement — Sci Adv. 2024 Jul 12;10(28):eadn2091. doi: 10.1126/sciadv.adn2091 (PMC11244444; doi:10.1126/sciadv.adn2091), 2024-07-12
Supplement: sciadv.adn2091_sm.pdf [file sciadv.adn2091_sm.pdf]

Supplementary Materials for

**Robust reprogramming of glia into neurons by inhibition of Notch signaling  
and nuclear factor I (NFI) factors in adult mammalian retina**

Nguyet Le *et al.*

Corresponding author: Seth Blackshaw, sblack@jhmi.edu; Thanh Hoang, thahoang@umich.edu

*Sci. Adv.* **10**, eadn2091 (2024)  
DOI: 10.1126/sciadv.adn2091

**The PDF file includes:**

Figs. S1 to S9  
Tables S4 to S5  
Legends for tables S1 to S3

**Other Supplementary Material for this manuscript includes the following:**

Tables S1 to S3

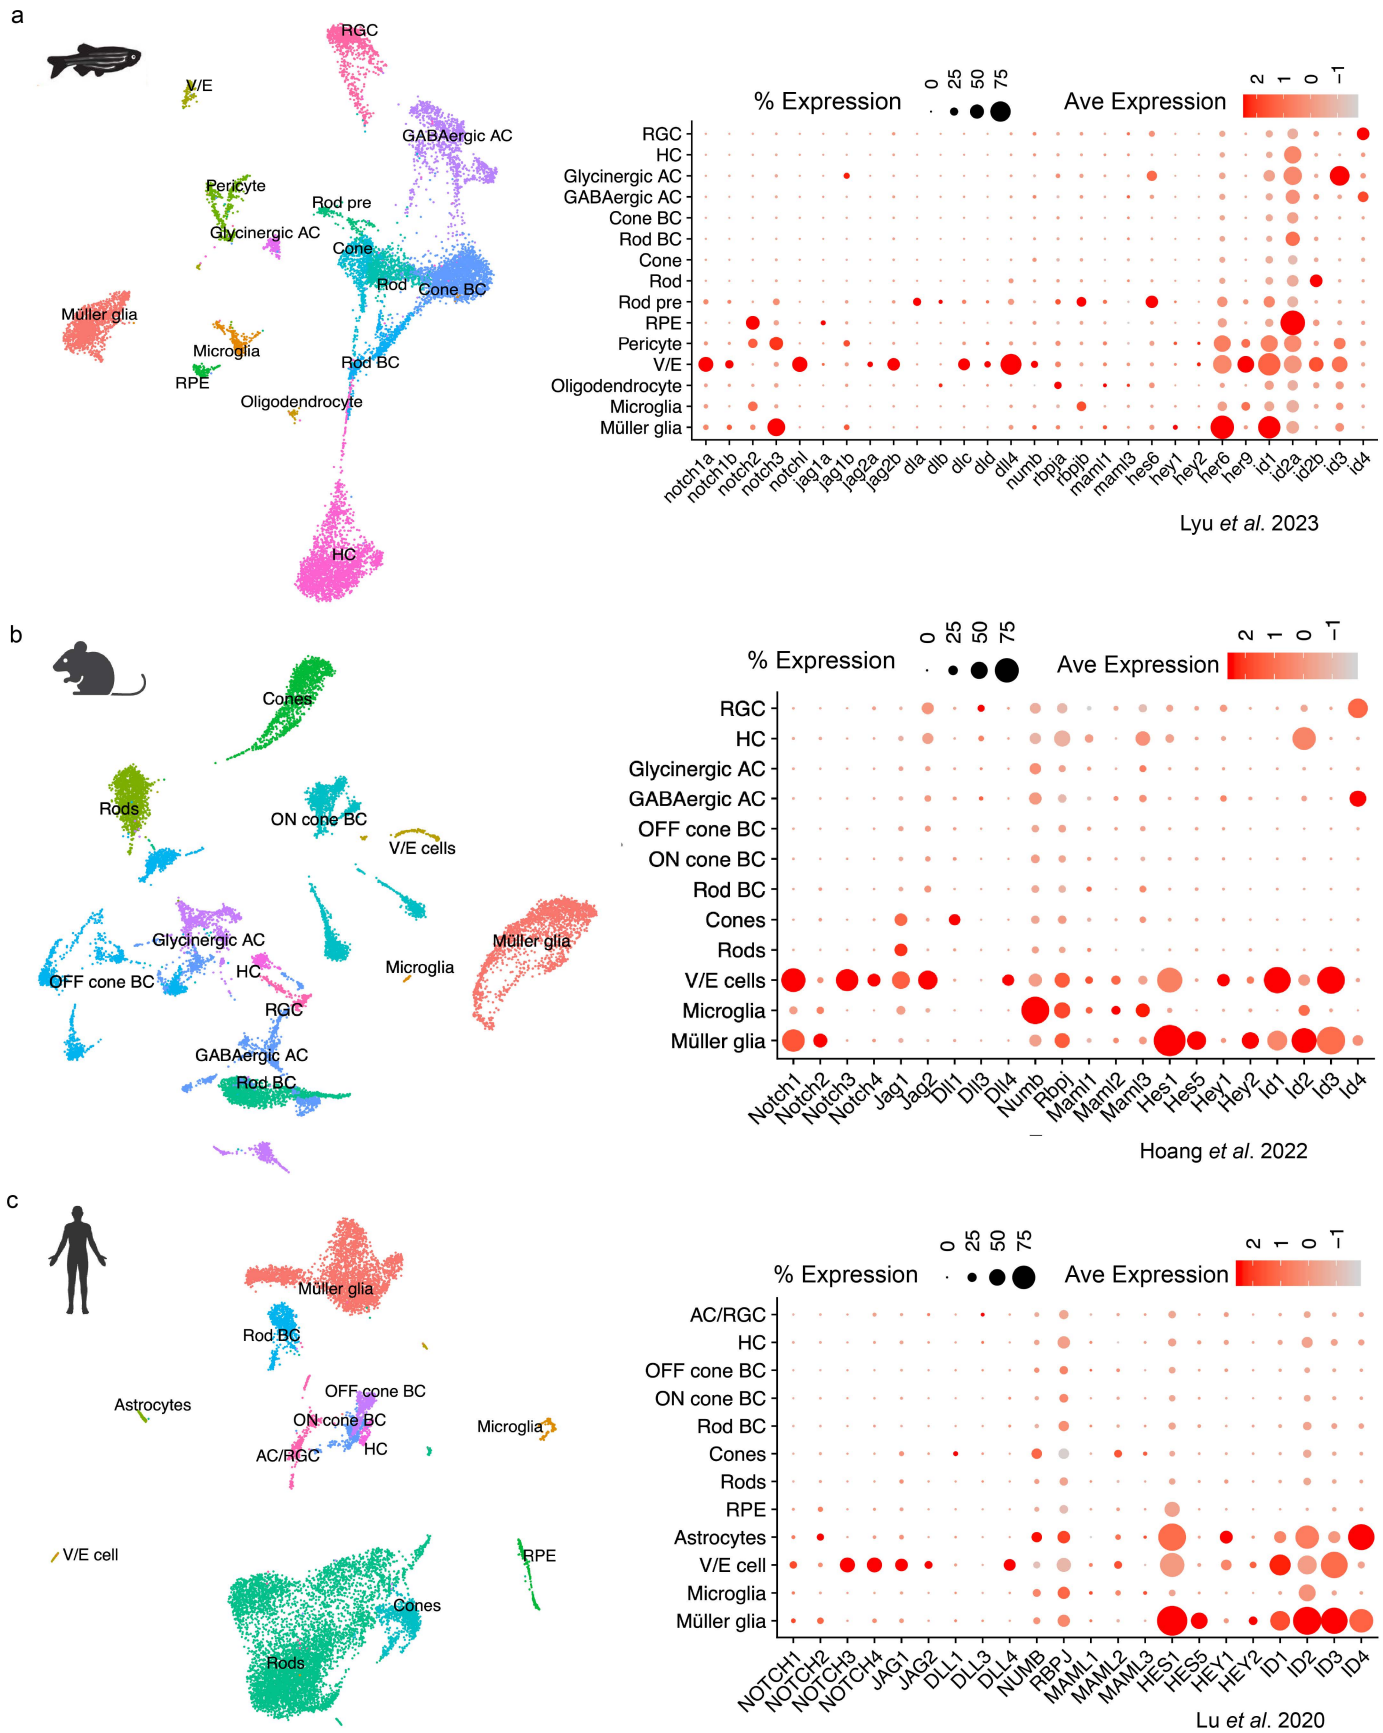

**Figure S1: scRNA expression of Notch signaling components in adult zebrafish, mouse and human retinas.**

(a) UMAP plot of scRNA-Seq data from adult zebrafish retina from (23), and Dot Plot showing cellular expression levels of Notch pathway components in each major cell type. (b) UMAP plot of scRNA-Seq data from adult mouse retina from (22), and Dot Plot showing cellular expression levels of Notch pathway components in each major cell type. (c) UMAP of scRNA-Seq data from adult human retina from (21), and Dot Plot showing cellular expression levels of Notch pathway components in each major cell type.

WT control

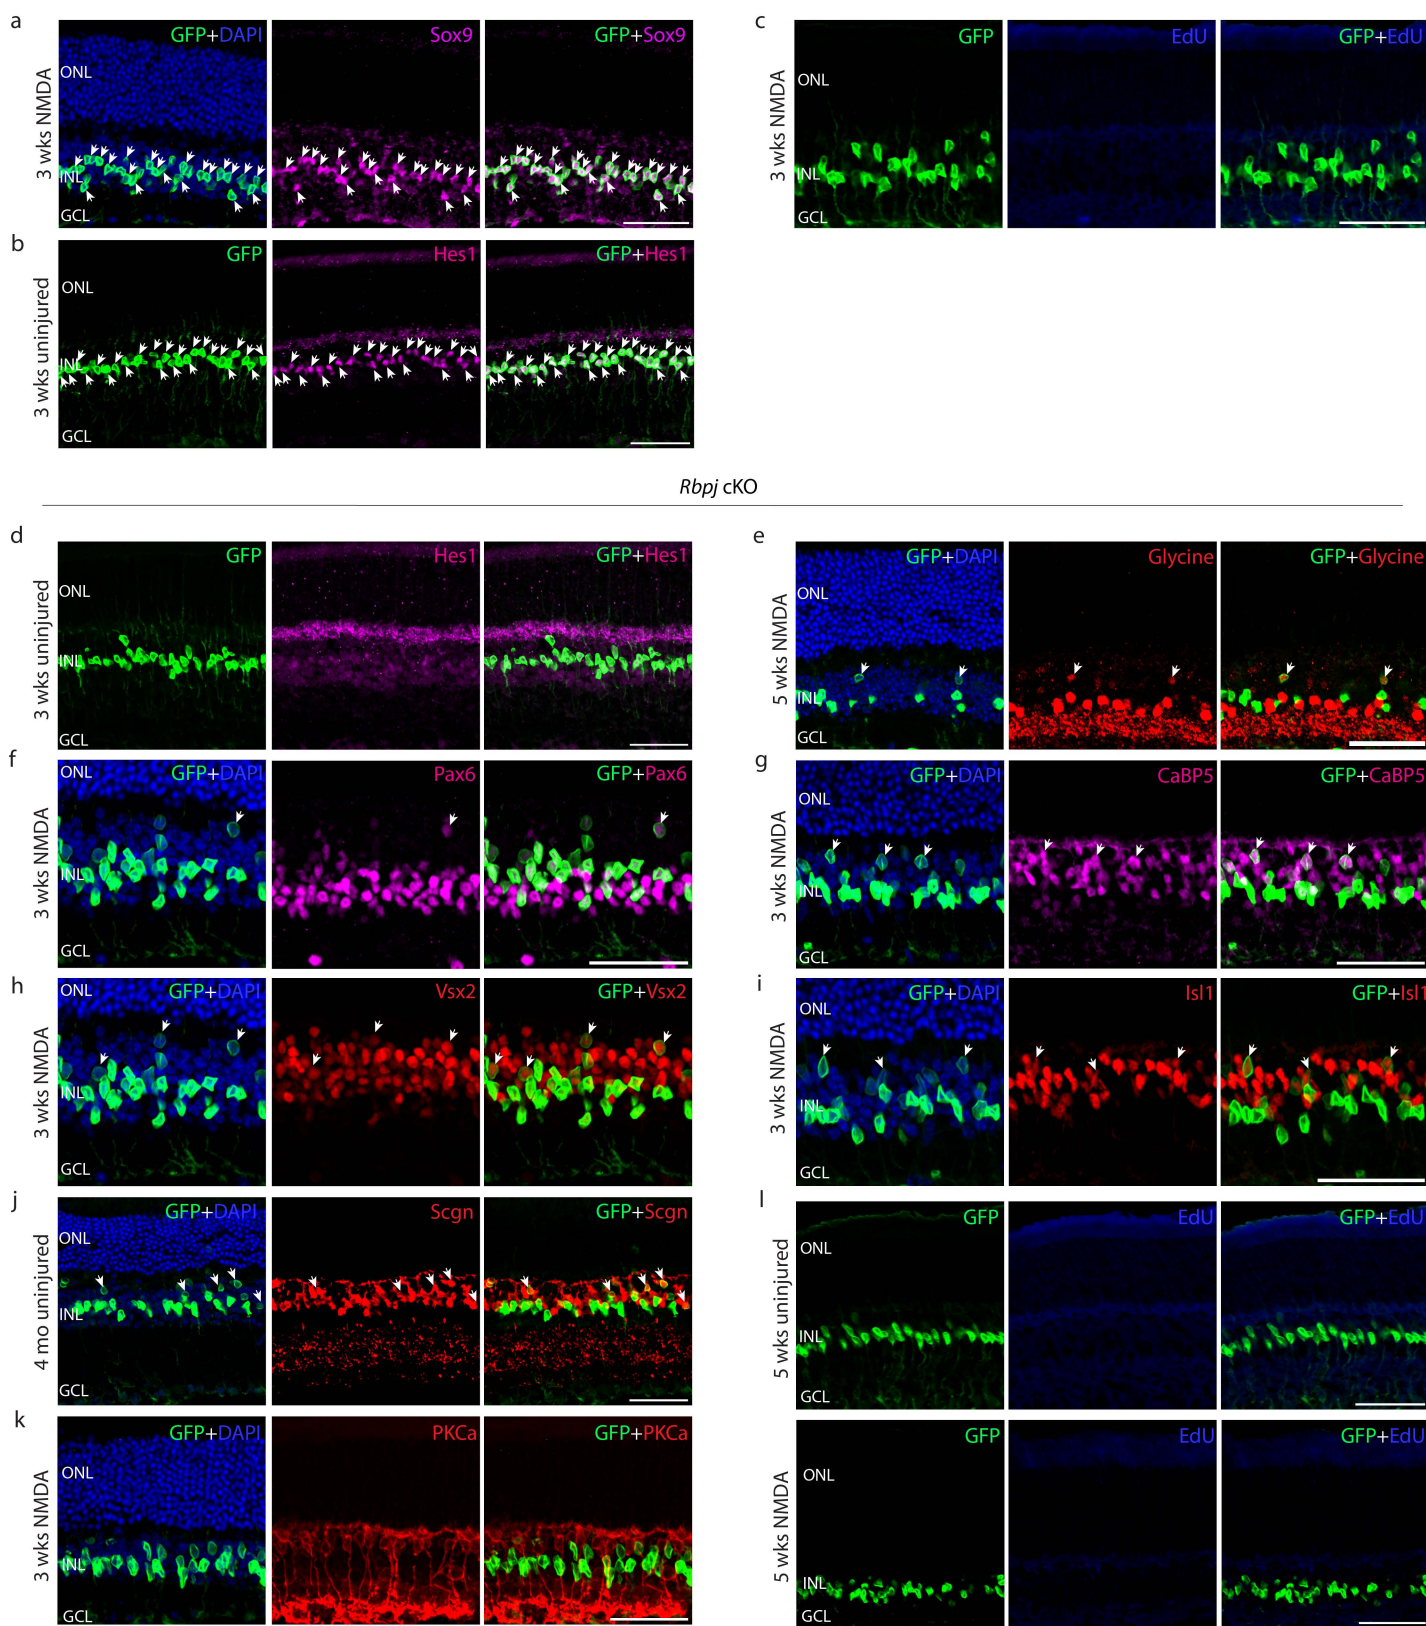

**Figure S2: Immunohistochemical analysis of glial and neuronal markers and EdU incorporation in wildtype and *Rbpj*-deficient Müller glia.**

(a-c) Representative images of control retina immunolabeled for GFP and (a) Sox9, (b) Hes1, (c) EdU. (d-h) Representative images of *Rbpj*-deficient retina immunolabeled for GFP and (d) Hes1, (e) Glycine, (f) Pax6, (g) CaBP5, (h) Vsx2, (i) Isl1, (j) Scgn, (k) PKCa, (l) EdU. White arrowheads indicate cells colabeled with both GFP and the relevant marker. ONL, outer nuclear layer; INL, inner nuclear layer; GCL, ganglion cell layer. Scale bar = 50µm.

*Rbpj* cKO

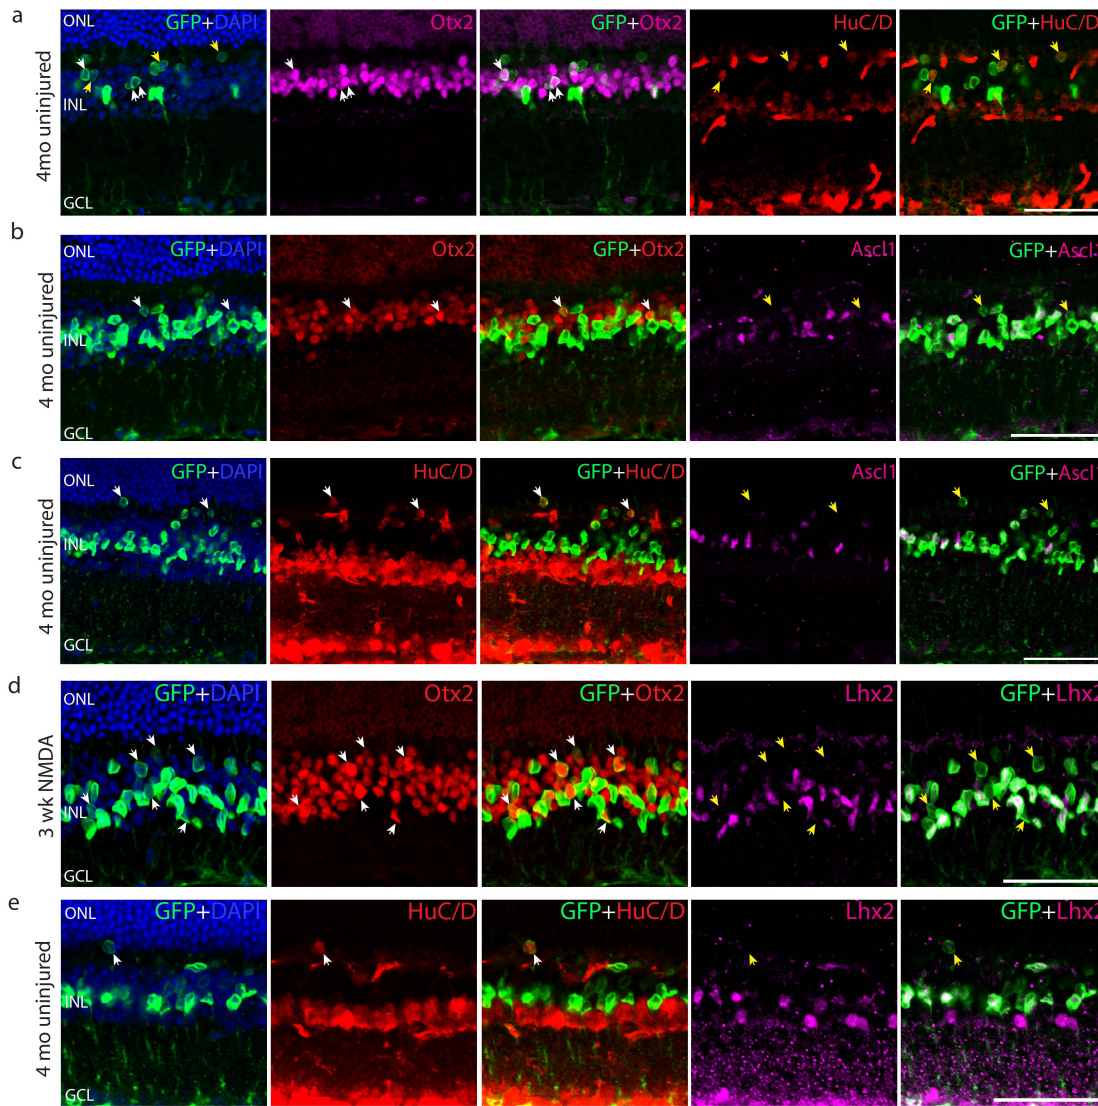

*Notch1/2* cKO

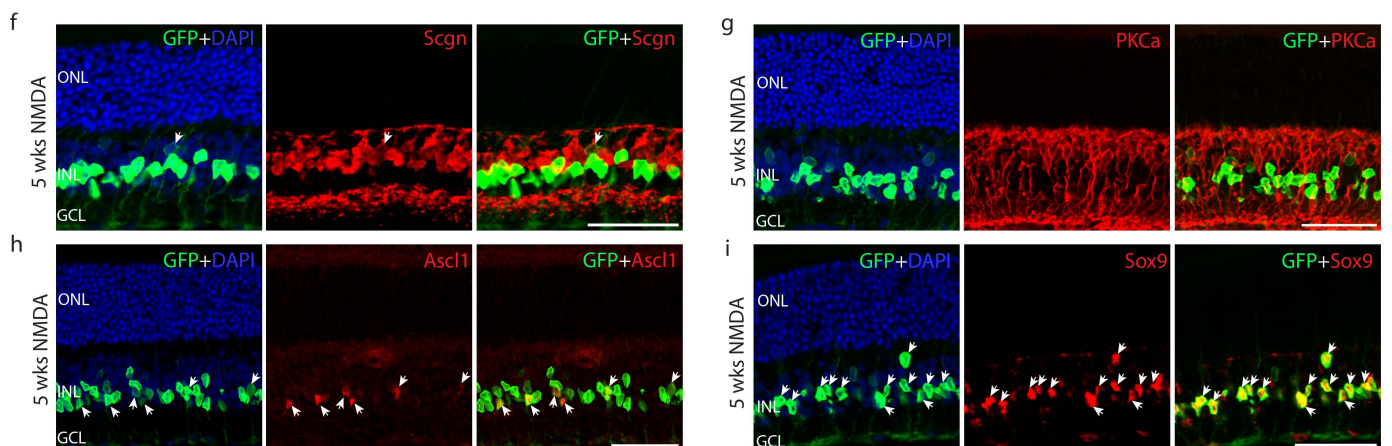

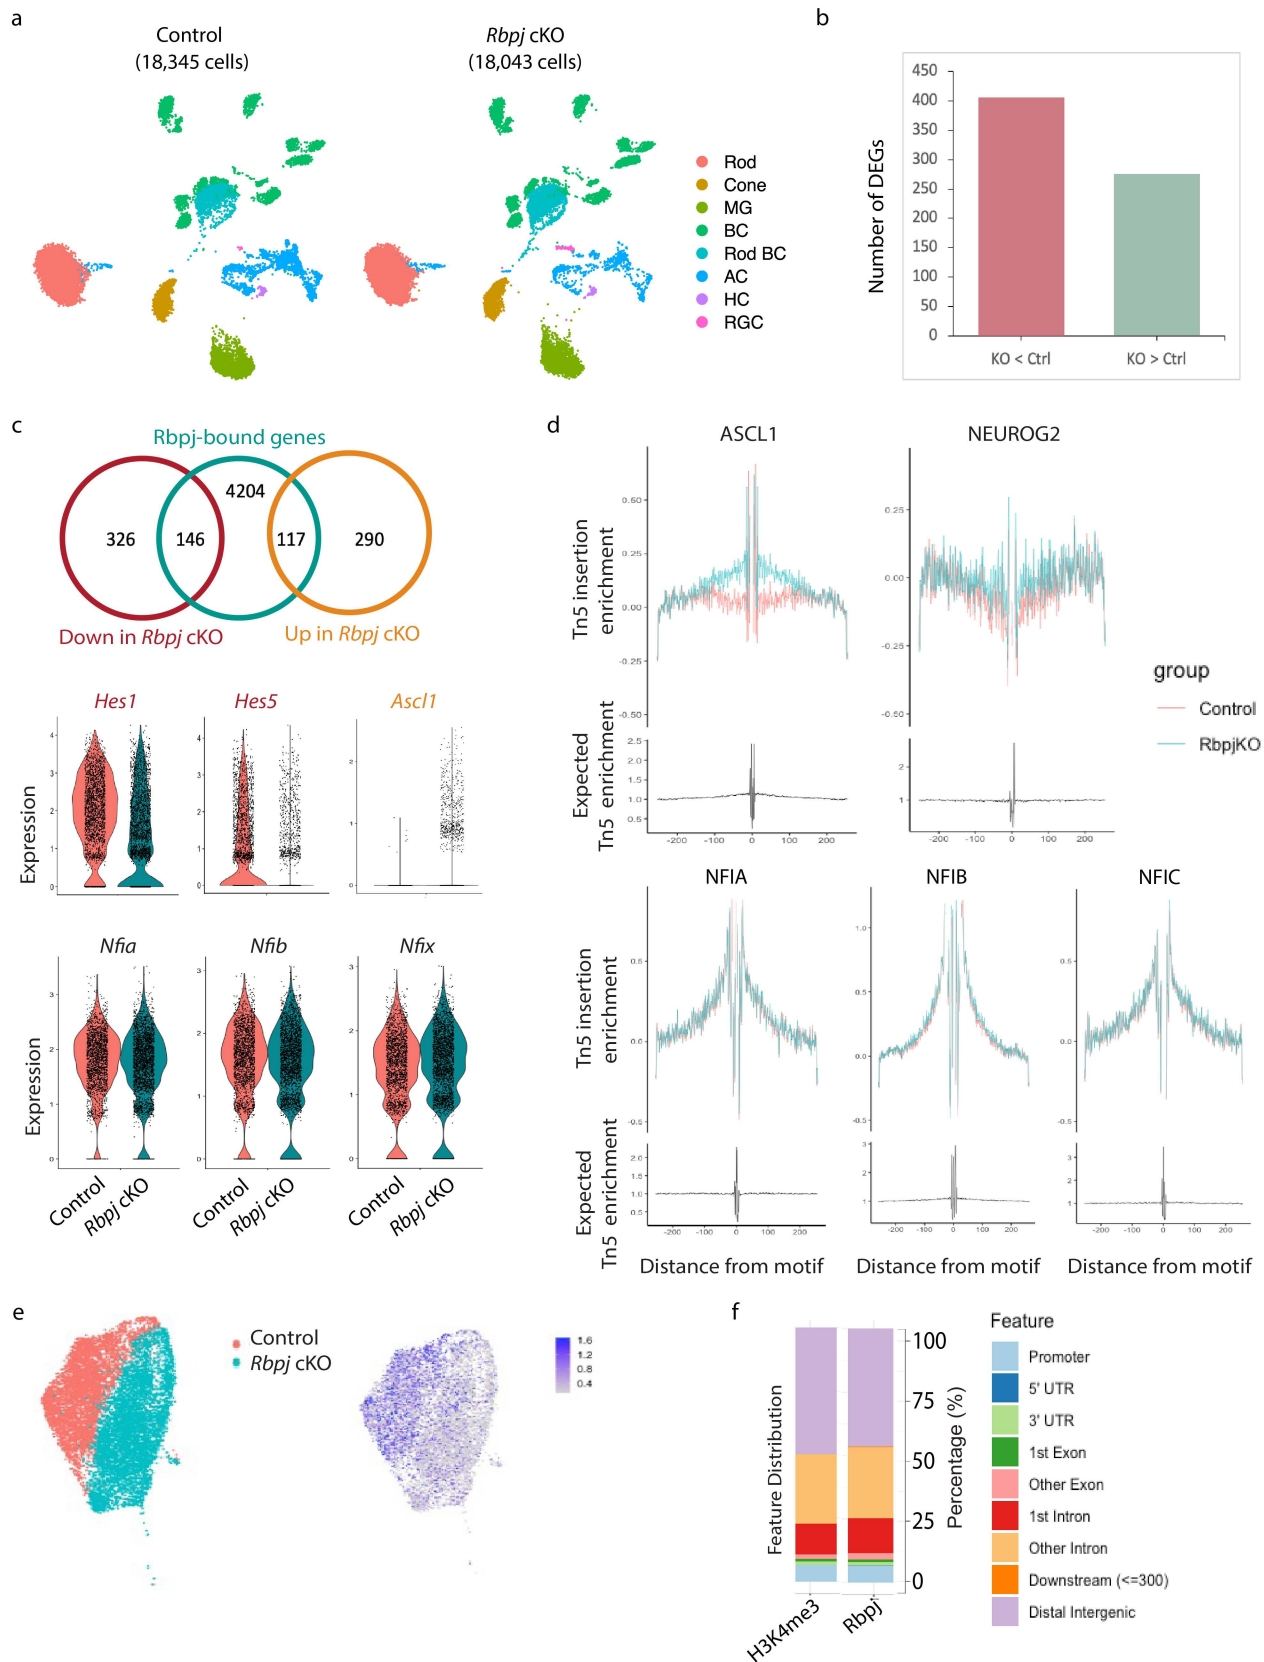

**Figure S4: Integrated multiomic analysis to identify *Rbpj* target genes**

(a) scRNA-Seq clustering of control and *Rbpj* cKO uninjured whole retinas at 1 week after tamoxifen injection. (b) Number of differentially expressed genes between control and *Rbpj*-deficient Müller glia. (c) Integrative analysis of CUT&Tag and scRNA-seq data to identify genes regulated by *Rbpj*. Violin plots showing gene expression levels of *Hes1/5*, *Ascl1*, *Nfia/b/x* in control and *Rbpj*-deficient MG. (d) TF footprint profiles for *Ascl1*, *Neurog2*, and *Nfia/b/x*. Tn5 insertion tracks are shown below. (e) Clustering of scATAC-seq data showing a reduction of *Rbpj* motif activity in the *Rbpj*-deficient Müller glia, as expected. (f) Distribution of Cut&Tag sequencing reads from H3K4me3 and *Rbpj* samples mapping to genomic features.

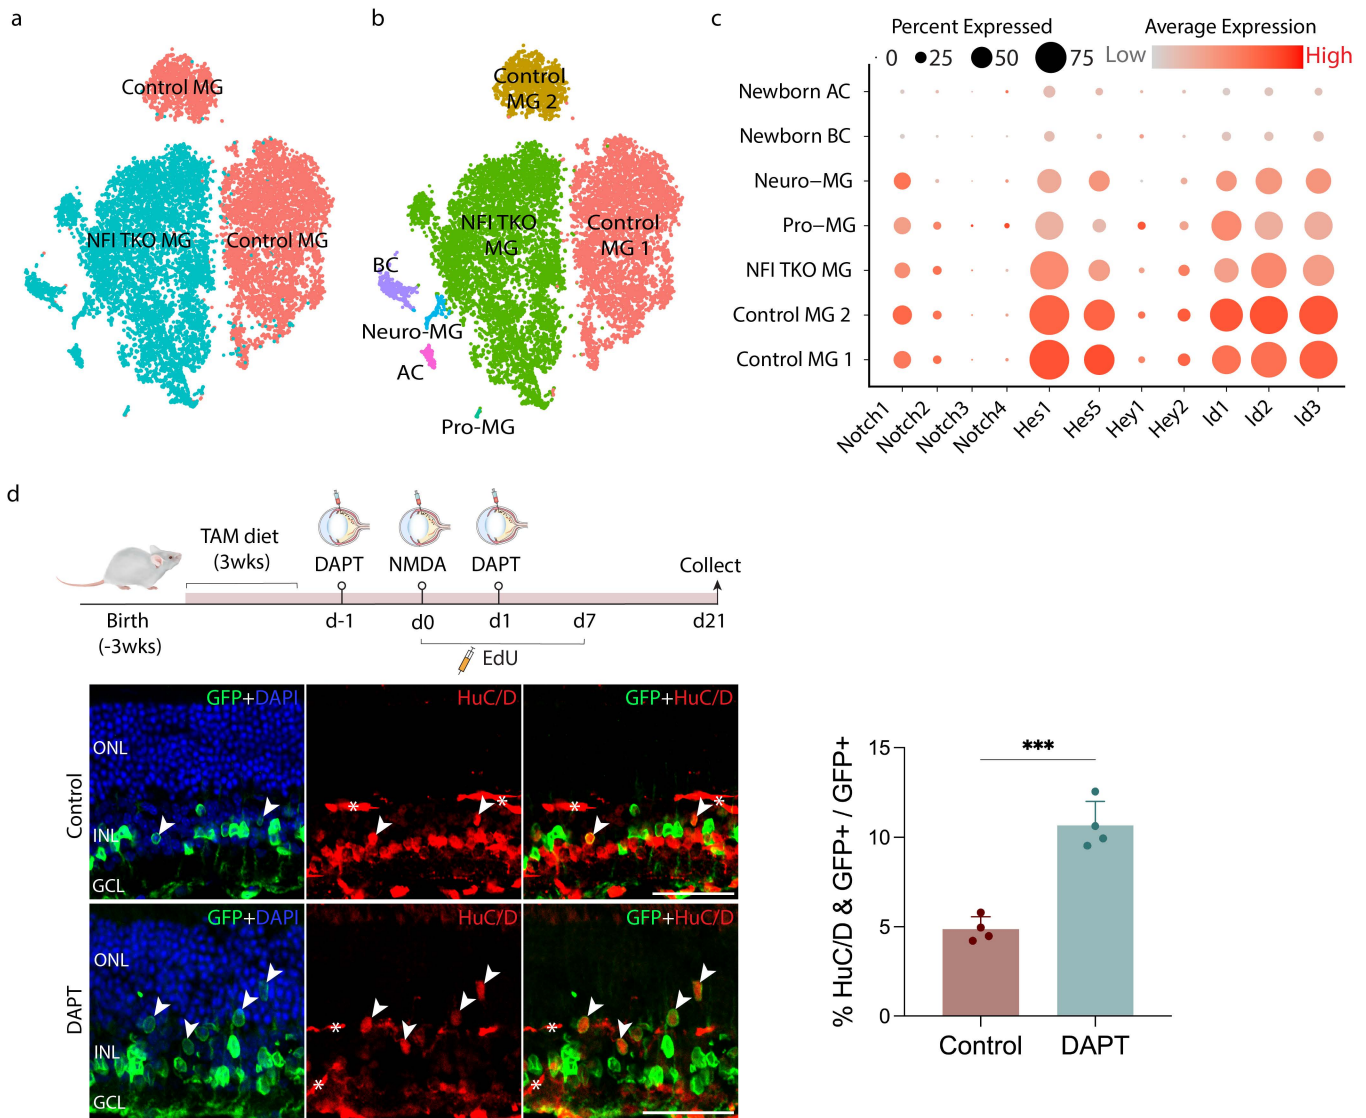

**Figure S5: Notch signaling is retained in *Nfia/b/x*-deficient Müller glia, and DAPT-mediated Notch inhibition enhances reprogramming.**

(a) Clustering of control and *Nfia/b/x*-deficient MG (b) Cell clusters determined by marker gene expression. (c) Dot plot showing gene expression and cell percentages for Notch pathway genes for different cell populations. (d) Representative IHC for GFP and HuC/D expression in control and DAPT-treated retinas. White arrowheads indicate colabeled GFP+/marker+ cell. \*Asterisks indicate mouse-on-mouse vascular staining. Quantification of mean percentage  $\pm$ SD HuC/D/GFP+ / GFP+ cells. Significance was determined via unpaired t test: \*\*\*\* $p < 0.0001$ .  $n=4$ . ONL, outer nuclear layer; INL, inner nuclear layer; GCL, ganglion cell layer. Scale bar = 50  $\mu$ m.

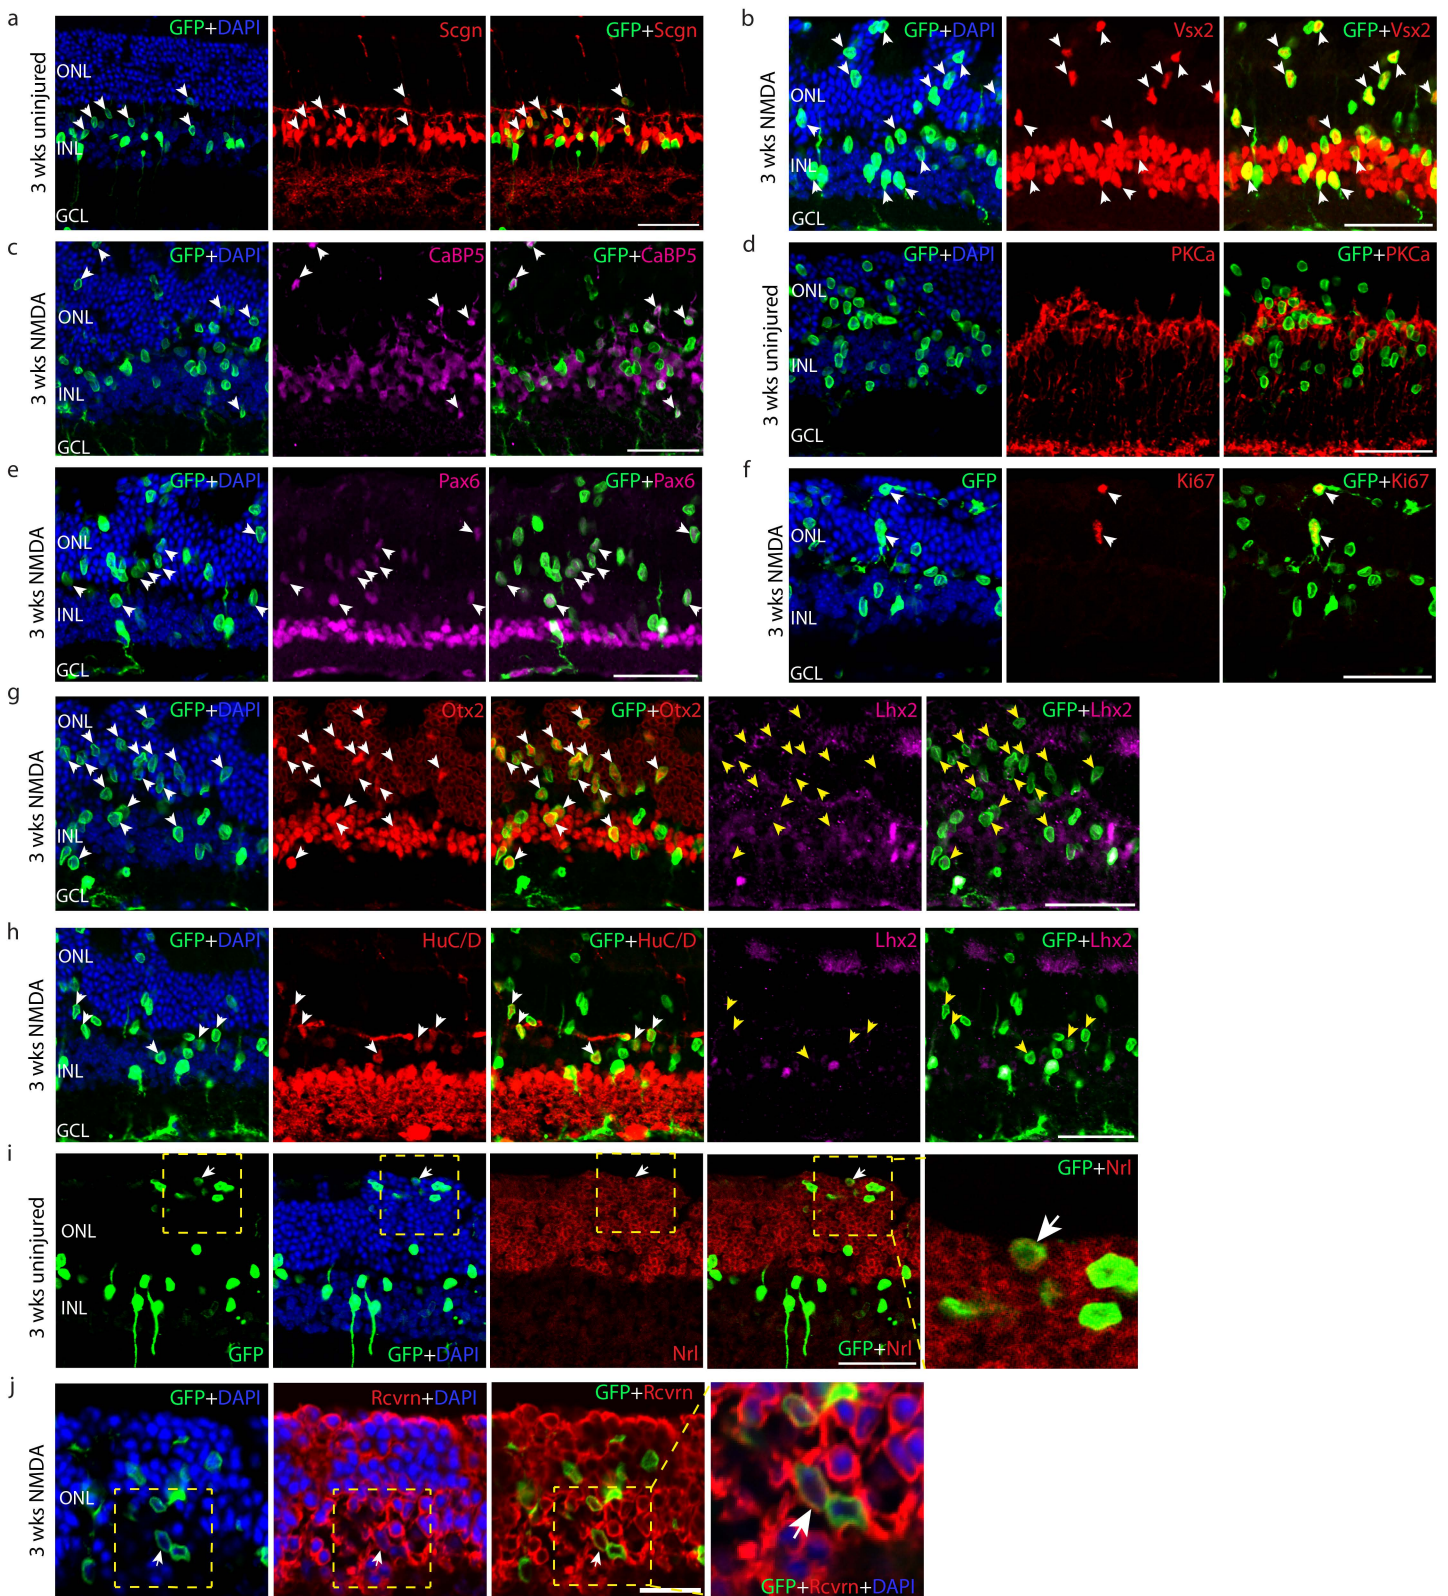

**Figure S6: Immunohistochemical analysis of additional markers and EdU incorporation following loss of function of *Nfia/b/x* and *Rbpj* in adult Müller glia.** Representative images of retinal sections immunolabeled for GFP and (a) Scgn, (b) Vsx2, (c) CaBP5 (d) PKCa, (e) Pax6, (f) Ki67, (g) Otx2 and Lhx2, (h) HuC/D and Lhx2, (i) Nrl, (j) Rcvrn. White arrowheads indicate cells colabeled with both GFP and the relevant marker. Yellow arrowheads indicate GFP+ cells that do not express the relevant marker. ONL, outer nuclear layer; INL, inner nuclear layer; GCL, ganglion cell layer. Scale bar = 50µm (a-i) and 20µm (j).

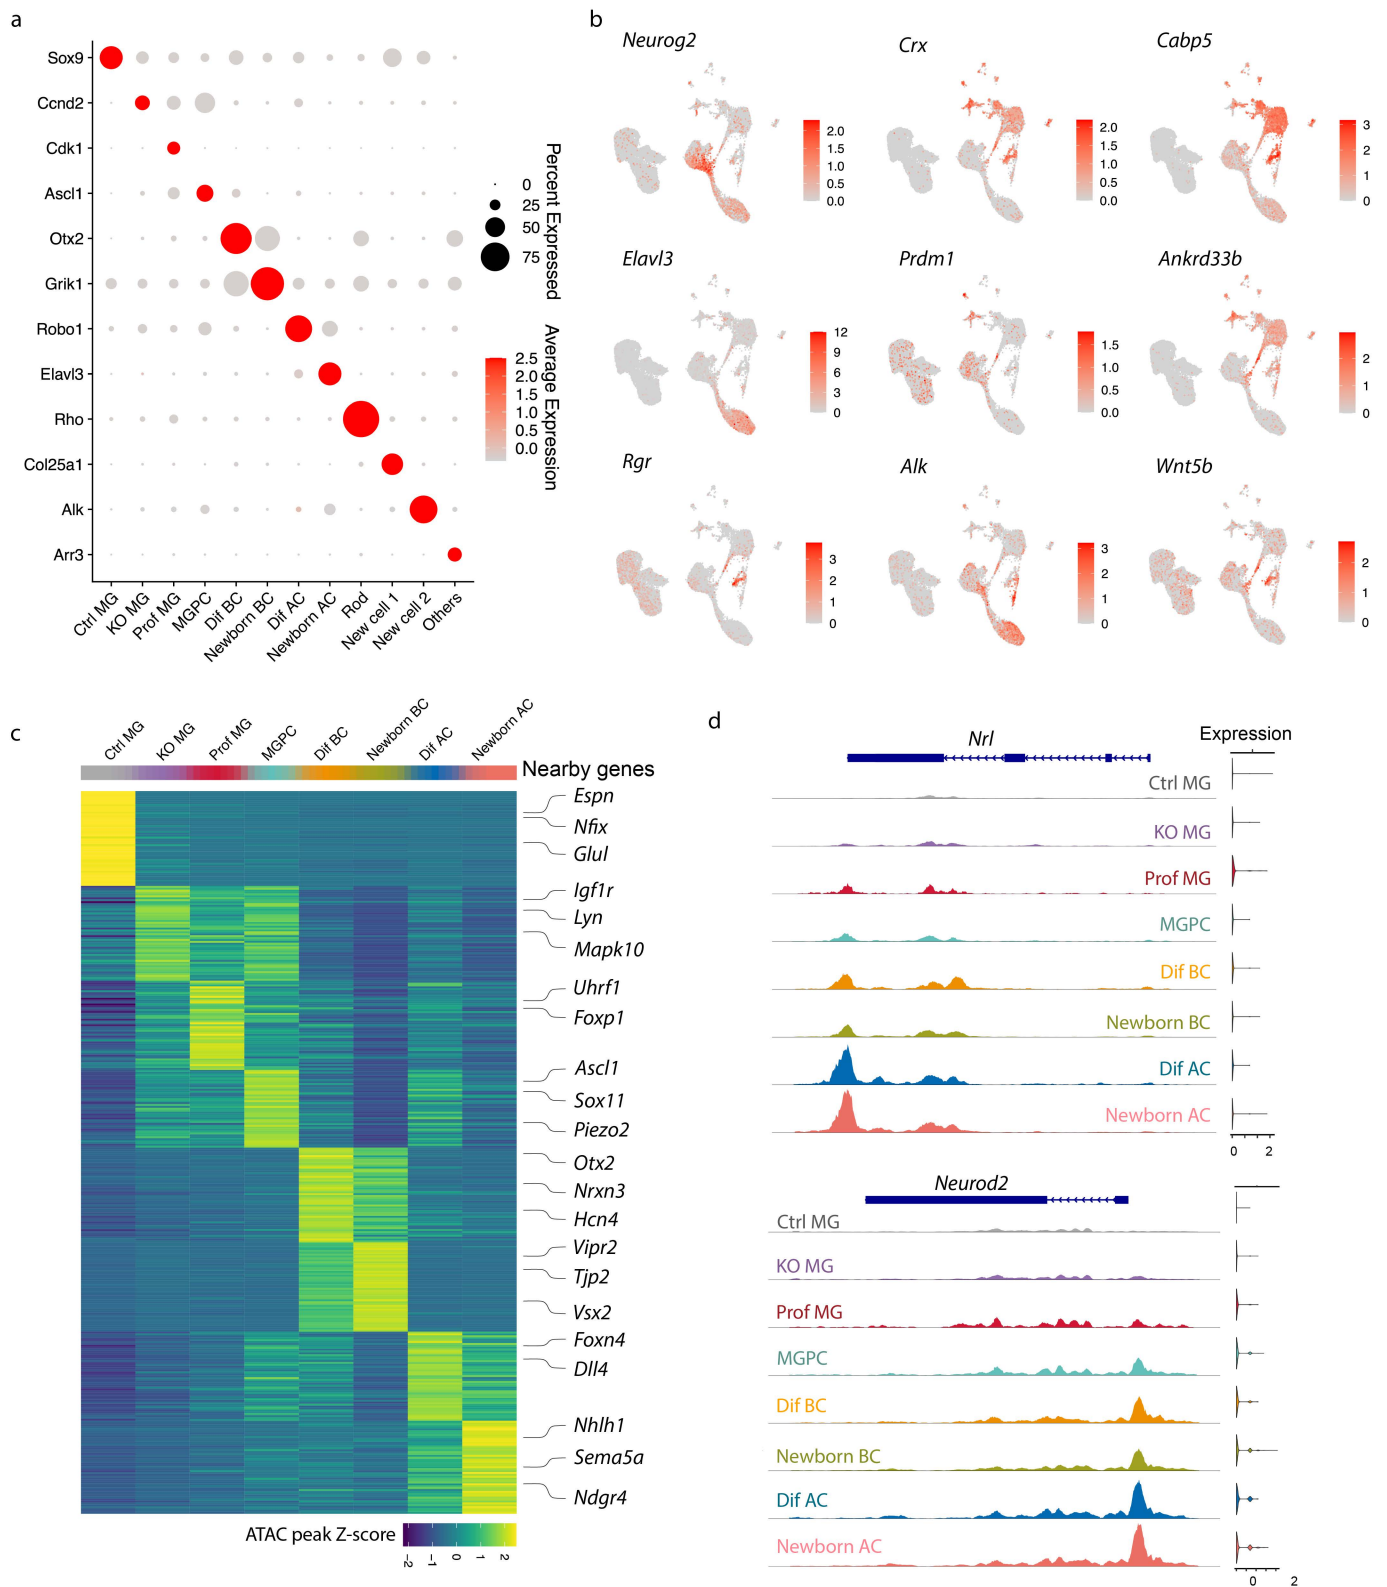

**Figure S7: Additional analysis of multiomic data from wildtype control and *Nfia/b/x;Rbpj*-deficient retinas.**

(a) Dot plot showing gene expression and cell percentages for Müller glia, neurogenic and neuronal marker genes for different cell populations. (b) Feature plots highlighting the cluster of MGPC (*Neurog2*), bipolar cell (*Cabp5*), amacrine cell (*Elavl3*), photoreceptors and their precursors (*Prdm1*, *Ankrd33b*, *Wnt5b*, *Arr3*, *Crx*, *Rgr*). (c) Heatmap of top 50 differential ATAC peaks for each cell population and selected nearby genes. (d) Representative ATAC peaks and RNA expression levels for *Nrl* and *Neurod2* across different cell clusters.



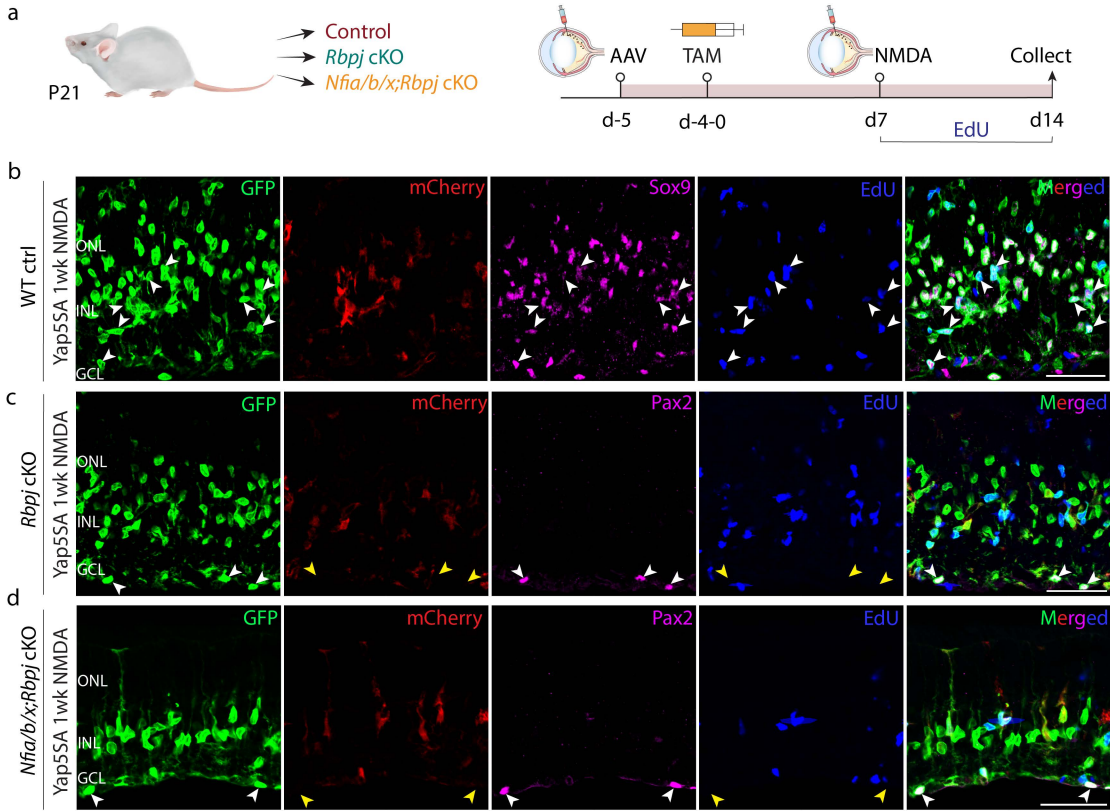

**Figure S8: Immunohistochemical analysis of Müller glia and astrocyte markers following AAV-mediated overexpression of YAP5SA in wildtype, *Rbpj*- and *Nfia/b/x;Rbpj*-deficient retinas.**

(a) A schematic of experimental pipeline. (b) Representative images of retinal sections immunolabeled for GFP, mCherry, Sox9 and EdU in wildtype control retinas. (c, d) Representative images of retinal sections immunolabeled for GFP, mCherry, astrocyte marker Pax2 and EdU in *Rbpj* cKO and *Nfia/b/x;Rbpj* cKO retinas. White arrowheads indicate co-labeled GFP/marker+ cells. Yellow arrowheads indicate GFP+ cells that do not co-express mCherry and the relevant marker. ONL, outer nuclear layer; INL, inner nuclear layer; GCL, ganglion cell layer. Scale bar = 50  $\mu$ m.

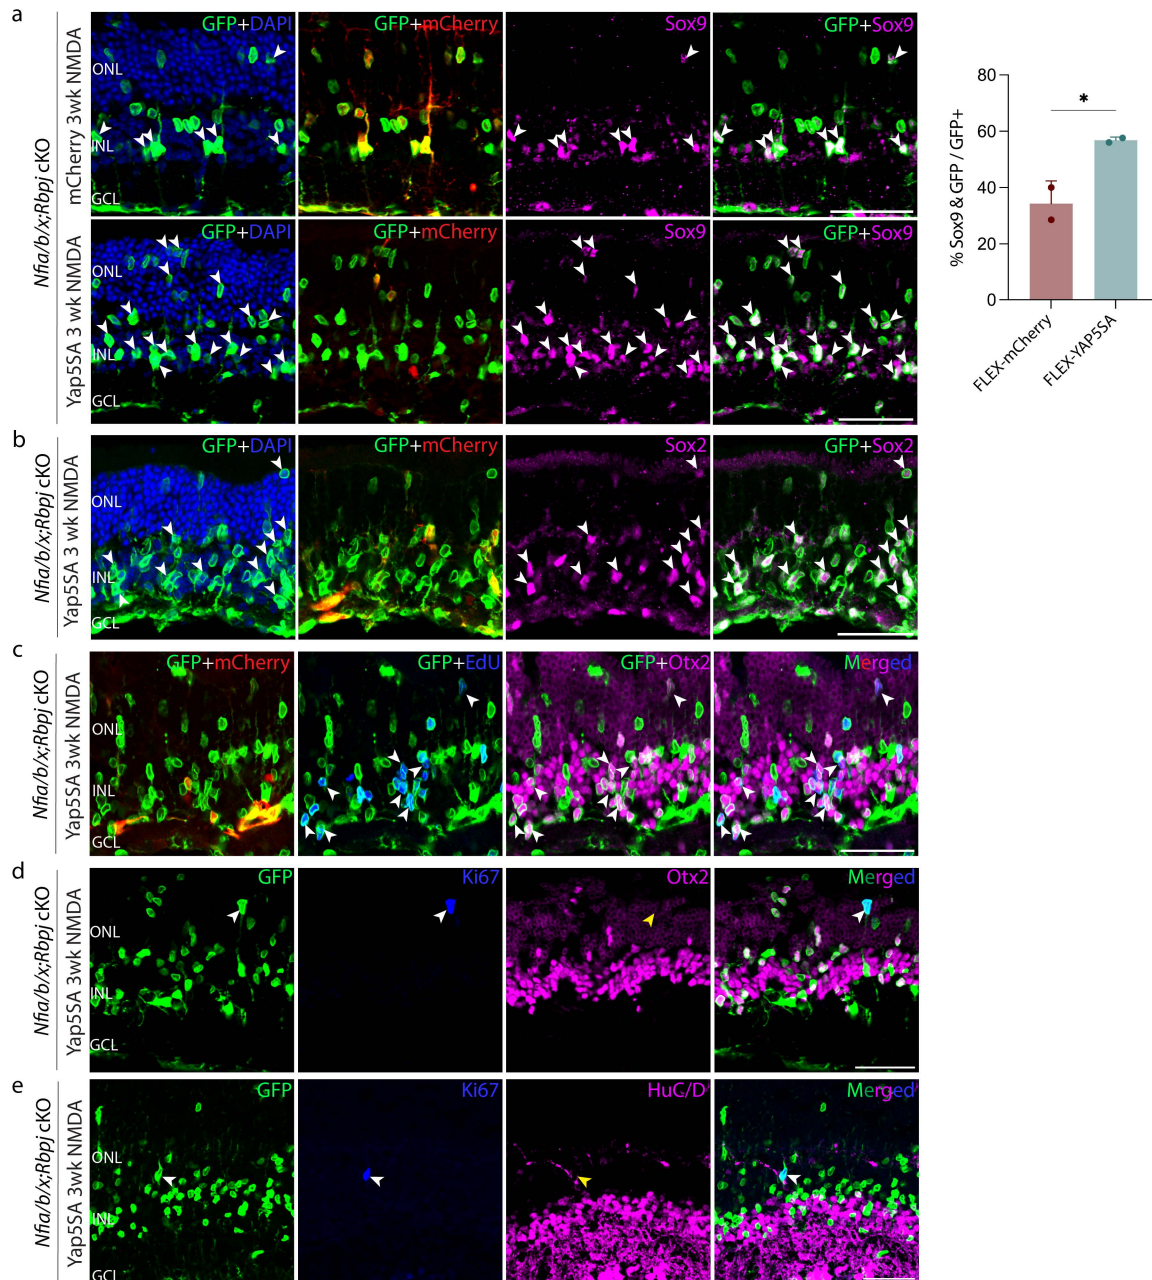

**Figure S9: Immunohistochemical analysis of additional markers following AAV-mediated overexpression of YAP5SA in *Nfia/b/x;Rbpj*-deficient retinas.**

(a) Representative images of retinal sections immunolabeled for GFP, mCherry and Sox9 in *Nfia/b/x;Rbpj* cKO retinas. Quantification of mean percentage  $\pm$ SD Sox9/GFP+ cells. (b) Representative images of retinal sections immunolabeled for GFP, mCherry, and Sox2 in *Nfia/b/x;Rbpj* cKO retinas. (c) Representative images of retinal sections immunolabeled for GFP, mCherry, EdU, and Otx2 in *Nfia/b/x;Rbpj* cKO retinas. (d,e) Representative images of retinal sections immunolabeled for GFP, Ki67, and Otx2 or HuC/D in *Nfia/b/x;Rbpj* cKO retinas. White arrowheads indicate co-labeled GFP/marker+ cells. Yellow arrowheads indicate GFP+ cells that do not express the relevant marker. Significance was determined via unpaired t test: \*\*\*\* $p < 0.0001$ .  $n=2$ . ONL, outer nuclear layer; INL, inner nuclear layer; GCL, ganglion cell layer. Scale bar = 50  $\mu$ m.

| <b>AAV-FLEX Constructs</b>   | <b>Titre (gc/ml)</b> | <b>Injection volume (µl)</b> |
|------------------------------|----------------------|------------------------------|
| smCBA-DIO-mCherry            | 1.30E <sup>13</sup>  | 2µl/eye                      |
| smCBA-DIO-Yap5SA-P2A-mCherry | 4.20E <sup>12</sup>  | 2.5µl/eye                    |

**Table S4:** List of AAV constructs used in the study. Columns identify the AAV construct, titre, and injection volume.

| <b>KEY RESOURCE TABLE</b>         |                               |                              |
|-----------------------------------|-------------------------------|------------------------------|
| <b>REAGENT or RESOURCE</b>        | <b>SOURCE</b>                 | <b>IDENTIFIER</b>            |
| <b>Antibodies</b>                 |                               |                              |
| Chicken anti-GFP                  | ThermoFisher                  | A10262, RRID:AB_2534023      |
| Rabbit anti-RFP                   | Abcam                         | ab124754, RRID:AB_10971665   |
| Goat anti-RFP                     | Rockland                      | 200-101-379, RRID:AB_2744552 |
| Goat anti-Otx2                    | R&D Systems                   | AF1979, RRID:AB_2157172      |
| Mouse anti-HuC/D                  | ThermoFisher                  | A-21271, RRID:AB_221448      |
| Mouse anti-NeuN                   | Sigma-Aldrich                 | MAB377, RRID:AB_2298772      |
| Rabbit anti-Sox9                  | Sigma-Aldrich                 | AB5535, RRID:AB_2239761      |
| Goat anti-Nrl                     | R&D Systems                   | AF2945, RRID:AB_2155098      |
| Rabbit anti-Rcvrn                 | Millipore                     | AB5585, RRID:AB_2253622      |
| Rabbit anti-Scgn                  | Biovendor Laboratory Medicine | RD181120100, RRID:AB_2034060 |
| Mouse anti-PKCa                   | Santa Cruz                    | sc-8393, RRID:AB_628142      |
| Rabbit anti-Ascl1                 | Abcam                         | ab211327, RRID:AB_2924270    |
| Rabbit anti-CaBP5                 | SynapticSystems               | 475 002, RRID:AB_2924962     |
| Rabbit anti-Pax2                  | BioLegend                     | 901002, RRID:AB_2734656      |
| Goat anti-Sox2                    | R&D Systems                   | AF2018, RRID:AB_355110       |
| Rabbit anti-Lhx2                  | ThermoFisher                  | PA5-78287, RRID:AB_2736088   |
| Rabbit anti-Pax6                  | BioLegend                     | 901301, RRID:AB_2749901      |
| Mouse anti-Isl1                   | DSHB                          | 40.2D6, RRID:AB_528315       |
| Sheep anti-Vsx2                   | Exalpha                       | X1180P, RRID:AB_2314191      |
| Rabbit anti-Hes1                  | Cell Signaling Technology     | 11988, RRID:AB_2728766       |
| Rat anti-Glycine                  | Immunosolution                | IG1002, RRID:AB_10013222     |
| Rabbit anti-Ki67                  | ThermoFisher                  | MA5-14520, RRID:AB_10979488  |
| Rabbit anti-Rbpj                  | Abcam                         | ab25949, RRID:AB_778155      |
| Rabbit anti-H3K27me3              | EpiCypher                     | 13-0055t                     |
| Rabbit anti-IgG                   | EpiCypher                     | 13-0042t                     |
| Donkey anti-Rabbit 405            | Abcam                         | ab175651, RRID:AB_2923541    |
| Donkey anti-Chicken 488           | Sigma-Aldrich                 | SAB4600031, RRID:AB_2721061  |
| Donkey anti-Rabbit 568            | ThermoFisher                  | A-10042, RRID:AB_2757564     |
| Donkey anti-Goat 568              | ThermoFisher                  | A11057, RRID:AB_2534104      |
| Donkey anti-Mouse 568             | ThermoFisher                  | A10037, RRID:AB_2534013      |
| Donkey anti-Rat 568               | ThermoFisher                  | A78946, RRID:AB_2910653      |
| Donkey anti-Goat 633              | ThermoFisher                  | A-21082, RRID:AB_2535739     |
| Donkey anti-Rabbit 647            | ThermoFisher                  | A-31573, RRID:AB_2536183     |
| Donkey anti-Mouse 647             | ThermoFisher                  | A-31571, RRID:AB_162542      |
| <b>Critical commercial assays</b> |                               |                              |
| 10x scRNaseq 3' v3.1              | 10X Genomics                  | 1000268                      |
| 10x scATACseq v1.1                | 10X Genomics                  | 1000175                      |
| 10x Multiome ATAC + GEX           | 10X Genomics                  | 1000283                      |
| Click-iT Edu Alexa Fluor 647      | ThermoFisher                  | C10340                       |
| Click-iT Edu Pacific Blue         | ThermoFisher                  | C10418                       |
| CUTANA Cut&Tag kit                | Epicypther                    | SKU: 14-1101                 |

**Table S5:** List of antibodies used in the study. Columns identify the antibody, source, catalog number, and RRID identifier.

**Table S1:** List of genes, chromatin regions, and transcription factor motifs that are differentially regulated in *Rbpj*-deficient Müller glia+MGPCs (scRNA-Seq and scATAC-Seq).

**Table S2:** List of genes and genomic loci directly targeted by RBPJ in Müller glia.

**Table S3:** List of genes, chromatin regions, and transcription factor motifs that are differentially regulated in wildtype control, *Nfia/b/x+Rbpj*-deficient Müller glia and their progenies.
